# Supplementary material for: Long-term effectiveness of an ultra-rapid rollout vaccination campaign with BNT162b2 on the incidence of SARS-CoV-2 infection
Source: PubMed Central journal article supplement — iScience. 2024 Oct 10;27(11):111117. doi: 10.1016/j.isci.2024.111117 (PMC11567098; doi:10.1016/j.isci.2024.111117), 2024-10-10
Supplement: mmc1.pdf [file mmc1.pdf]

**Supplemental information**

**Long-term effectiveness of an ultra-rapid  
rollout vaccination campaign with BNT162b2  
on the incidence of SARS-CoV-2 infection**

**Lena Tschiderer, Hanna Innerhofer, Lisa Seekircher, Lisa Wattle, Lukas Richter, Janine Kimpel, Cornelia Lass-Flörl, Lukas Forer, Sebastian Schönherr, David A. Larsen, Florian Krammer, Sabine Embacher-Aichhorn, Herbert Tilg, Günter Weiss, Franz Allerberger, and Peter Willeit**

## Supplementary tables

**Table S1. Characteristics of REDUCE study participants overall and separately for those who did vs. those who did not participate in the long-term follow-up, related to Table 1.**

| Characteristic                      | Overall   |                               | Participated in long-term follow-up |                               | Did not participate in long-term follow-up |                               | P-value <sup>a</sup> |
|-------------------------------------|-----------|-------------------------------|-------------------------------------|-------------------------------|--------------------------------------------|-------------------------------|----------------------|
|                                     | Total no. | Mean ± SD, median (IQR), or % | Total no.                           | Mean ± SD, median (IQR), or % | Total no.                                  | Mean ± SD, median (IQR), or % |                      |
| Age – years                         | 11,955    | 44.6 (32.2-55.8)              | 3,859                               | 44.6 (32.3-55.6)              | 8,096                                      | 44.6 (32.1-56.0)              | 0.419                |
| Female sex                          | 11,955    | 51.3                          | 3,859                               | 52.5                          | 8,096                                      | 50.7                          | 0.061                |
| ≥3 persons in household             | 11,731    | 54.4                          | 3,802                               | 56.8                          | 7,929                                      | 53.2                          | <b>&lt;0.001</b>     |
| Body mass index – kg/m <sup>2</sup> | 11,893    | 25.4 ± 4.6                    | 3,840                               | 25.3 ± 4.5                    | 8,053                                      | 25.4 ± 4.7                    | 0.421                |
| Smoking status                      | 11,875    |                               | 3,836                               |                               | 8,039                                      |                               | 0.130                |
| Current smoker                      |           | 26.3                          |                                     | 25.7                          |                                            | 26.6                          |                      |
| Former smoker                       |           | 28.6                          |                                     | 27.9                          |                                            | 28.9                          |                      |
| Never smoker                        |           | 45.1                          |                                     | 46.5                          |                                            | 44.5                          |                      |
| Current occupation                  | 11,833    |                               | 3,830                               |                               | 8,003                                      |                               | <b>&lt;0.001</b>     |
| Employed                            |           | 72.5                          |                                     | 73.0                          |                                            | 72.2                          |                      |
| Unemployed                          |           | 12.5                          |                                     | 13.4                          |                                            | 12.0                          |                      |
| On parental leave                   |           | 2.6                           |                                     | 2.8                           |                                            | 2.5                           |                      |
| Retired                             |           | 12.5                          |                                     | 10.8                          |                                            | 13.3                          |                      |
| Highest education                   | 11,663    |                               | 3,772                               |                               | 7,891                                      |                               | <b>&lt;0.001</b>     |
| Compulsory school not completed     |           | 0.3                           |                                     | 0.2                           |                                            | 0.4                           |                      |
| Compulsory school                   |           | 10.4                          |                                     | 10.7                          |                                            | 10.3                          |                      |
| Apprenticeship diploma              |           | 38.3                          |                                     | 40.0                          |                                            | 37.5                          |                      |
| Vocational school or Advanced level |           | 33.9                          |                                     | 35.3                          |                                            | 33.2                          |                      |
| University degree                   |           | 17.1                          |                                     | 13.8                          |                                            | 18.7                          |                      |
| Prior SARS-CoV-2 infection          | 11,955    | 13.8                          | 3,859                               | 13.9                          | 8,096                                      | 13.8                          | 0.891                |
| Months since prior infection        | 1,545     | 4.0 (3.4-4.6)                 | 503                                 | 4.1 (3.4-4.6)                 | 1,042                                      | 4.0 (3.4-4.6)                 | 0.591                |
| Other pre-existing conditions       |           |                               |                                     |                               |                                            |                               |                      |
| Cardiovascular disease              | 11,892    | 11.4                          | 3,843                               | 11.0                          | 8,049                                      | 11.6                          | 0.392                |
| Diabetes mellitus                   | 11,900    | 2.7                           | 3,845                               | 2.2                           | 8,055                                      | 2.9                           | 0.035                |
| Chronic lung disease                | 11,837    | 4.2                           | 3,825                               | 3.4                           | 8,012                                      | 4.6                           | <b>0.002</b>         |
| Cancer                              | 11,915    | 3.2                           | 3,849                               | 3.5                           | 8,066                                      | 3.1                           | 0.339                |
| Renal disease                       | 11,913    | 1.2                           | 3,848                               | 1.1                           | 8,065                                      | 1.3                           | 0.395                |
| Liver disease                       | 11,898    | 0.8                           | 3,845                               | 0.6                           | 8,053                                      | 0.9                           | 0.116                |
| Intake of immunosuppressants        | 11,887    | 1.2                           | 3,839                               | 1.0                           | 8,048                                      | 1.4                           | 0.056                |

<sup>a</sup>P-value for difference between individuals who were versus were not included in the long-term follow-up. P-values are from Mann-Whitney-U-test for continuous non-normally distributed variables, from t-test for continuous normally distributed variables, and from  $\chi^2$ -test for categorical variables. After correcting for multiple testing, P-values < 0.003 (0.05/16 covariates) are deemed statistically significant, which are marked in bold. Abbreviations: IQR, interquartile range; SARS-CoV-2, severe acute respiratory syndrome coronavirus type 2; SD, standard deviation

| Characteristic                      | Overall   |                               | Participated in long-term follow-up |                               | Did not participate in long-term follow-up |                               | P-value <sup>a</sup> |
|-------------------------------------|-----------|-------------------------------|-------------------------------------|-------------------------------|--------------------------------------------|-------------------------------|----------------------|
|                                     | Total no. | Mean ± SD, median (IQR), or % | Total no.                           | Mean ± SD, median (IQR), or % | Total no.                                  | Mean ± SD, median (IQR), or % |                      |
| Age – years                         | 11,955    | 44.6 (32.2-55.8)              | 3,859                               | 44.6 (32.3-55.6)              | 8,096                                      | 44.6 (32.1-56.0)              | 0.419                |
| Female sex                          | 11,955    | 51.3                          | 3,859                               | 52.5                          | 8,096                                      | 50.7                          | 0.061                |
| ≥3 persons in household             | 11,731    | 54.4                          | 3,802                               | 56.8                          | 7,929                                      | 53.2                          | <b>&lt;0.001</b>     |
| Body mass index – kg/m <sup>2</sup> | 11,893    | 25.4 ± 4.6                    | 3,840                               | 25.3 ± 4.5                    | 8,053                                      | 25.4 ± 4.7                    | 0.421                |
| Smoking status                      | 11,875    |                               | 3,836                               |                               | 8,039                                      |                               | 0.130                |
| Current smoker                      |           | 26.3                          |                                     | 25.7                          |                                            | 26.6                          |                      |
| Former smoker                       |           | 28.6                          |                                     | 27.9                          |                                            | 28.9                          |                      |
| Never smoker                        |           | 45.1                          |                                     | 46.5                          |                                            | 44.5                          |                      |
| Current occupation                  | 11,833    |                               | 3,830                               |                               | 8,003                                      |                               | <b>&lt;0.001</b>     |
| Employed                            |           | 72.5                          |                                     | 73.0                          |                                            | 72.2                          |                      |
| Unemployed                          |           | 12.5                          |                                     | 13.4                          |                                            | 12.0                          |                      |
| On parental leave                   |           | 2.6                           |                                     | 2.8                           |                                            | 2.5                           |                      |
| Retired                             |           | 12.5                          |                                     | 10.8                          |                                            | 13.3                          |                      |
| Highest education                   | 11,663    |                               | 3,772                               |                               | 7,891                                      |                               | <b>&lt;0.001</b>     |
| Compulsory school not completed     |           | 0.3                           |                                     | 0.2                           |                                            | 0.4                           |                      |
| Compulsory school                   |           | 10.4                          |                                     | 10.7                          |                                            | 10.3                          |                      |
| Apprenticeship diploma              |           | 38.3                          |                                     | 40.0                          |                                            | 37.5                          |                      |
| Vocational school or Advanced level |           | 33.9                          |                                     | 35.3                          |                                            | 33.2                          |                      |
| University degree                   |           | 17.1                          |                                     | 13.8                          |                                            | 18.7                          |                      |
| Prior SARS-CoV-2 infection          | 11,955    | 13.8                          | 3,859                               | 13.9                          | 8,096                                      | 13.8                          | 0.891                |
| Months since prior infection        | 1,545     | 4.0 (3.4-4.6)                 | 503                                 | 4.1 (3.4-4.6)                 | 1,042                                      | 4.0 (3.4-4.6)                 | 0.591                |
| Other pre-existing conditions       |           |                               |                                     |                               |                                            |                               |                      |
| Cardiovascular disease              | 11,892    | 11.4                          | 3,843                               | 11.0                          | 8,049                                      | 11.6                          | 0.392                |
| Diabetes mellitus                   | 11,900    | 2.7                           | 3,845                               | 2.2                           | 8,055                                      | 2.9                           | 0.035                |
| Chronic lung disease                | 11,837    | 4.2                           | 3,825                               | 3.4                           | 8,012                                      | 4.6                           | <b>0.002</b>         |
| Cancer                              | 11,915    | 3.2                           | 3,849                               | 3.5                           | 8,066                                      | 3.1                           | 0.339                |
| Renal disease                       | 11,913    | 1.2                           | 3,848                               | 1.1                           | 8,065                                      | 1.3                           | 0.395                |
| Liver disease                       | 11,898    | 0.8                           | 3,845                               | 0.6                           | 8,053                                      | 0.9                           | 0.116                |
| Intake of immunosuppressants        | 11,887    | 1.2                           | 3,839                               | 1.0                           | 8,048                                      | 1.4                           | 0.056                |

**Table S2. SARS-CoV-2 infections in the REDUCE study during follow-up, related to Figure 1.**

|                            | Incident SARS-CoV-2 infections <sup>a</sup> |               |             |
|----------------------------|---------------------------------------------|---------------|-------------|
|                            | All                                         | First         | Second      |
| Number of events           | 1,784                                       | 1,672         | 111         |
| Duration of disease – days | 9 [6-10]                                    | 9 [7-10]      | 7 [6-11]    |
| Symptomatic                |                                             |               |             |
| Yes                        | 1,609 (90.2%)                               | 1,508 (90.2%) | 100 (90.1%) |
| No                         | 158 (8.9%)                                  | 150 (9.0%)    | 8 (7.2%)    |
| Unknown                    | 17 (1.0%)                                   | 14 (0.8%)     | 3 (2.7%)    |
| Respiratory symptoms       |                                             |               |             |
| Yes                        | 1,476 (82.7%)                               | 1,400 (83.7%) | 75 (67.6%)  |
| No                         | 291 (16.3%)                                 | 258 (15.4%)   | 33 (29.7%)  |
| Disturbance of taste       |                                             |               |             |
| Yes                        | 23 (1.3%)                                   | 18 (1.1%)     | 5 (4.5%)    |
| No                         | 1,744 (97.8%)                               | 1,640 (98.1%) | 103 (92.8%) |
| Disturbance of smell       |                                             |               |             |
| Yes                        | 22 (1.2%)                                   | 18 (1.1%)     | 4 (3.6%)    |
| No                         | 1,745 (97.8%)                               | 1,640 (98.1%) | 104 (93.7%) |
| Diarrhoea                  |                                             |               |             |
| Yes                        | 17 (1.0%)                                   | 9 (0.5%)      | 8 (7.2%)    |
| No                         | 1,750 (98.1%)                               | 1,649 (98.6%) | 100 (90.1%) |
| Pneumonia                  |                                             |               |             |
| Yes                        | 6 (0.3%)                                    | 6 (0.4%)      | 0 (0.0%)    |
| No                         | 1,761 (98.7%)                               | 1,652 (98.8%) | 108 (97.3%) |
| Other                      |                                             |               |             |
| Yes                        | 339 (19.0%)                                 | 275 (16.4%)   | 63 (56.8%)  |
| No                         | 1,428 (80.0%)                               | 1,383 (82.7%) | 45 (40.5%)  |

Data are represented as median [interquartile range] or number (percentage). <sup>a</sup>One participant had a third SARS-CoV-2 infection and we do not provide more infection-related details in order to protect the participant's anonymity. Abbreviations: SARS-CoV-2, severe acute respiratory syndrome coronavirus type 2.

**Table S3. STROBE checklist, related to STAR Methods.**

|                              | <b>Item No</b> | <b>Recommendation</b>                                                                                                                                                                                        | <b>Page No</b>        |
|------------------------------|----------------|--------------------------------------------------------------------------------------------------------------------------------------------------------------------------------------------------------------|-----------------------|
| Title and abstract           | 1              | (a) Indicate the study's design with a commonly used term in the title or the abstract                                                                                                                       | 1                     |
|                              |                | (b) Provide in the abstract an informative and balanced summary of what was done and what was found                                                                                                          | 2                     |
| <b>Introduction</b>          |                |                                                                                                                                                                                                              |                       |
| Background/<br>rationale     | 2              | Explain the scientific background and rationale for the investigation being reported                                                                                                                         | 3-4                   |
| Objectives                   | 3              | State specific objectives, including any prespecified hypotheses                                                                                                                                             | 4                     |
| <b>Methods</b>               |                |                                                                                                                                                                                                              |                       |
| Study design                 | 4              | Present key elements of study design early in the paper                                                                                                                                                      | 4-5                   |
| Setting                      | 5              | Describe the setting, locations, and relevant dates, including periods of recruitment, exposure, follow-up, and data collection                                                                              | 4-5                   |
| Participants                 | 6              | (a) Give the eligibility criteria, and the sources and methods of selection of participants. Describe methods of follow-up                                                                                   | 4-5                   |
|                              |                | (b) For matched studies, give matching criteria and number of exposed and unexposed                                                                                                                          | NA                    |
| Variables                    | 7              | Clearly define all outcomes, exposures, predictors, potential confounders, and effect modifiers. Give diagnostic criteria, if applicable                                                                     | 5                     |
| Data sources/<br>measurement | 8*             | For each variable of interest, give sources of data and details of methods of assessment (measurement). Describe comparability of assessment methods if there is more than one group                         | 5                     |
| Bias                         | 9              | Describe any efforts to address potential sources of bias                                                                                                                                                    | 5                     |
| Study size                   | 10             | Explain how the study size was arrived at                                                                                                                                                                    | 5                     |
| Quantitative variables       | 11             | Explain how quantitative variables were handled in the analyses. If applicable, describe which groupings were chosen and why                                                                                 | 7-8                   |
| Statistical methods          | 12             | (a) Describe all statistical methods, including those used to control for confounding                                                                                                                        | 6-8                   |
|                              |                | (b) Describe any methods used to examine subgroups and interactions                                                                                                                                          | 7-8                   |
|                              |                | (c) Explain how missing data were addressed                                                                                                                                                                  | 8                     |
|                              |                | (d) If applicable, explain how loss to follow-up was addressed                                                                                                                                               | 6                     |
|                              |                | (e) Describe any sensitivity analyses                                                                                                                                                                        | 6-8                   |
| <b>Results</b>               |                |                                                                                                                                                                                                              |                       |
| Participants                 | 13*            | (a) Report numbers of individuals at each stage of study—eg numbers potentially eligible, examined for eligibility, confirmed eligible, included in the study, completing follow-up, and analyzed            | 8                     |
|                              |                | (b) Give reasons for non-participation at each stage                                                                                                                                                         | 8                     |
|                              |                | (c) Consider use of a flow diagram                                                                                                                                                                           | NA                    |
| Descriptive data             | 14*            | (a) Give characteristics of study participants (eg demographic, clinical, social) and information on exposures and potential confounders                                                                     | 9, Table S1           |
|                              |                | (b) Indicate number of participants with missing data for each variable of interest                                                                                                                          | Table S1              |
|                              |                | (c) Summarize follow-up time (eg, average and total amount)                                                                                                                                                  | 9                     |
| Outcome data                 | 15*            | Report numbers of outcome events or summary measures over time                                                                                                                                               | 9, Table S2, Figure 1 |
| Main results                 | 16             | (a) Give unadjusted estimates and, if applicable, confounder-adjusted estimates and their precision (eg, 95% confidence interval). Make clear which confounders were adjusted for and why they were included | 9-11                  |
|                              |                | (b) Report category boundaries when continuous variables were categorized                                                                                                                                    | 10-11                 |
|                              |                | (c) If relevant, consider translating estimates of relative risk into absolute risk for a meaningful time period                                                                                             | 9-11                  |

|                          |    |                                                                                                                                                                            |       |
|--------------------------|----|----------------------------------------------------------------------------------------------------------------------------------------------------------------------------|-------|
| Other analyses           | 17 | Report other analyses done—eg analyses of subgroups and interactions, and sensitivity analyses                                                                             | 10-11 |
| <b>Discussion</b>        |    |                                                                                                                                                                            |       |
| Key results              | 18 | Summarize key results with reference to study objectives                                                                                                                   | 11    |
| Limitations              | 19 | Discuss limitations of the study, taking into account sources of potential bias or imprecision. Discuss both direction and magnitude of any potential bias                 | 15-16 |
| Interpretation           | 20 | Give a cautious overall interpretation of results considering objectives, limitations, multiplicity of analyses, results from similar studies, and other relevant evidence | 11-15 |
| Generalizability         | 21 | Discuss the generalizability (external validity) of the study results                                                                                                      | 15-16 |
| <b>Other information</b> |    |                                                                                                                                                                            |       |
| Funding                  | 22 | Give the source of funding and the role of the funders for the present study and, if applicable, for the original study on which the present article is based              | 17    |

---

<sup>a</sup>Period in which BNT162b2 dose 2 (April 8-13, 2021) and dose 3 (November 20-28, 2021) were administered within the REDUCE study.

# Supplementary figures

Figure S1. Percentage of individuals vaccinated against COVID-19 with two (Panel A) and three (Panel B) doses in the districts of Tyrol, related to Figure 1.

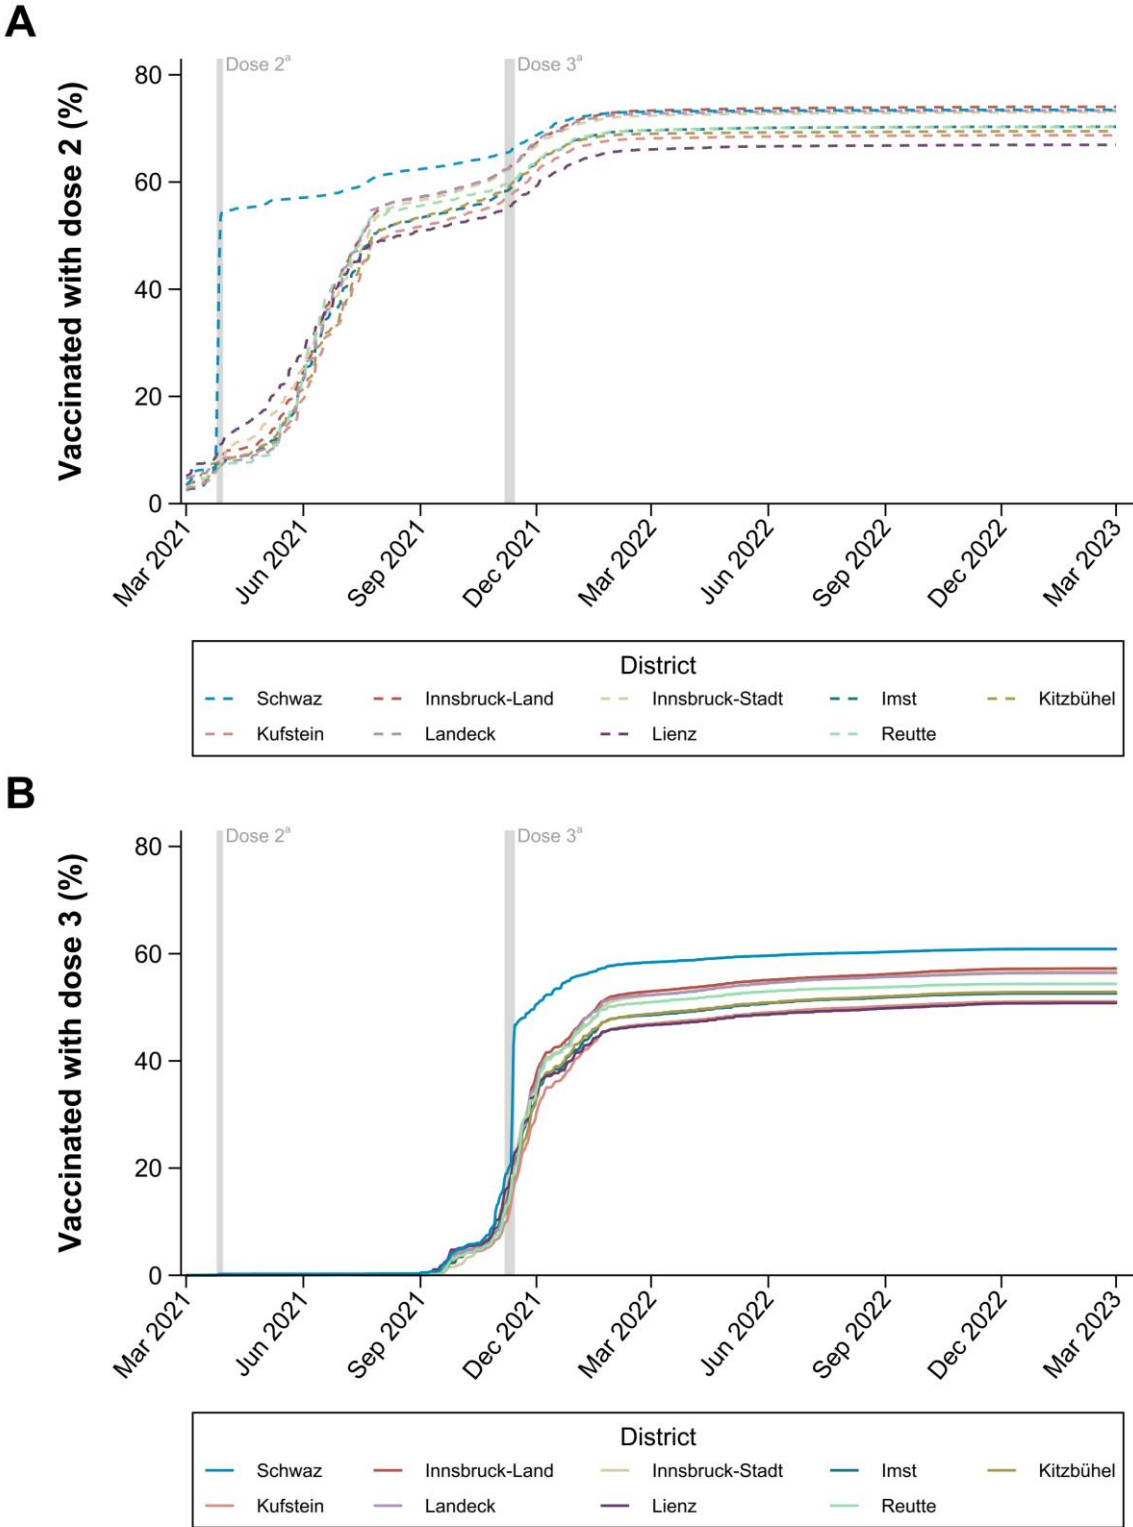

Figure S2. Percentage of individuals vaccinated against COVID-19 with four doses in the REDUCE study, the district of Schwaz, and other districts of Tyrol, related to Figure 1.

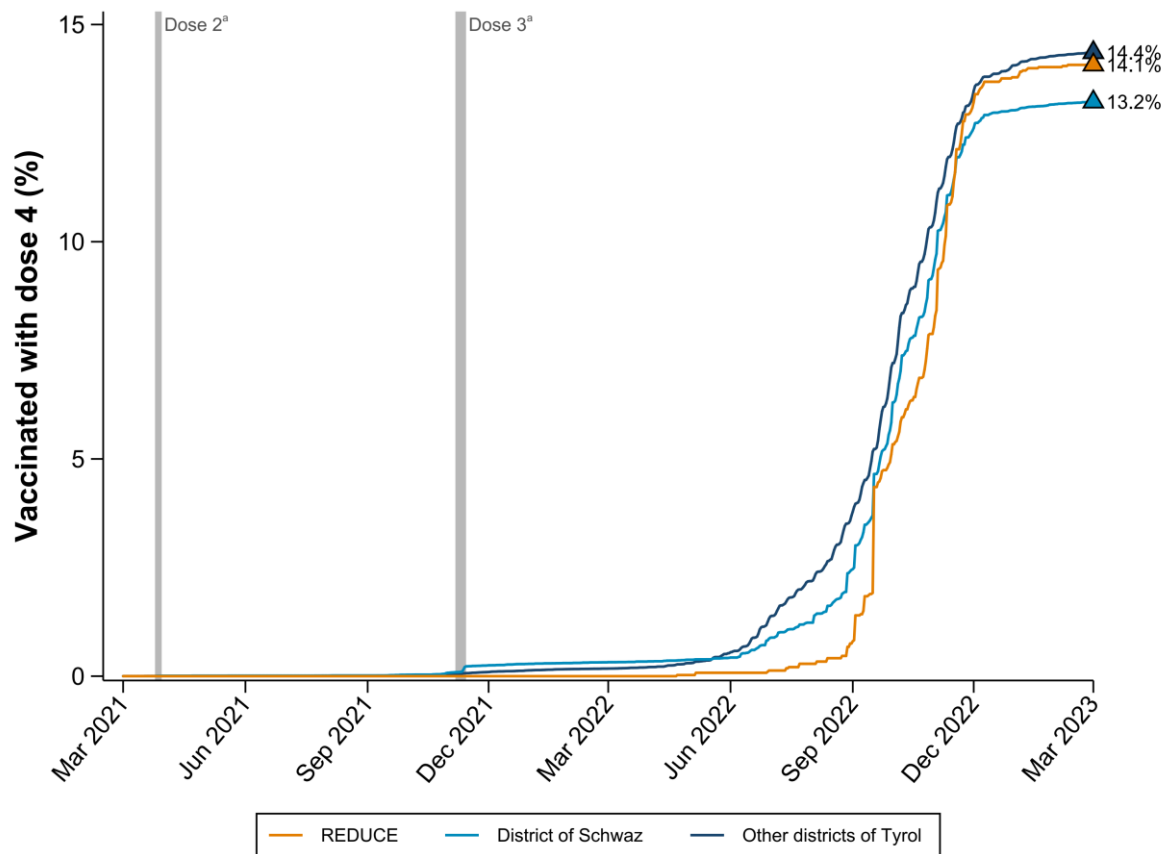

<sup>a</sup>Period in which BNT162b2 dose 2 (April 8-13, 2021) and dose 3 (November 20-28, 2021) were administered within the REDUCE study. Abbreviations: SARS-CoV-2, severe acute respiratory syndrome coronavirus type 2.

**Figure S3. Cumulative SARS-CoV-2 incidence in the REDUCE study, the district of Schwaz, and other districts of Tyrol, related to Figure 1.**



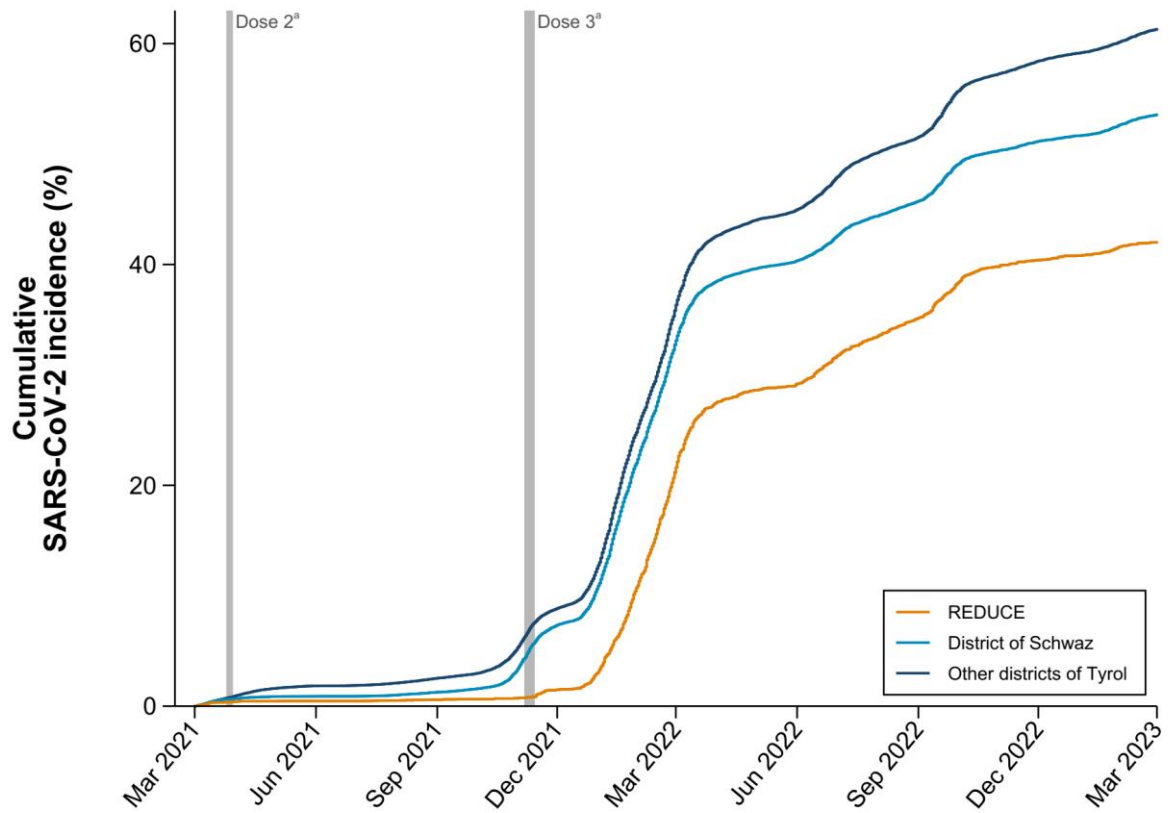

<sup>a</sup>Period in which BNT162b2 dose 2 (April 8-13, 2021) and dose 3 (November 20-28, 2021) were administered within the REDUCE study. Abbreviations: SARS-CoV-2, severe acute respiratory syndrome coronavirus type 2.

**Figure S4. Cumulative SARS-CoV-2 incidence in the REDUCE study and the districts of Tyrol, related to Figure 1.**

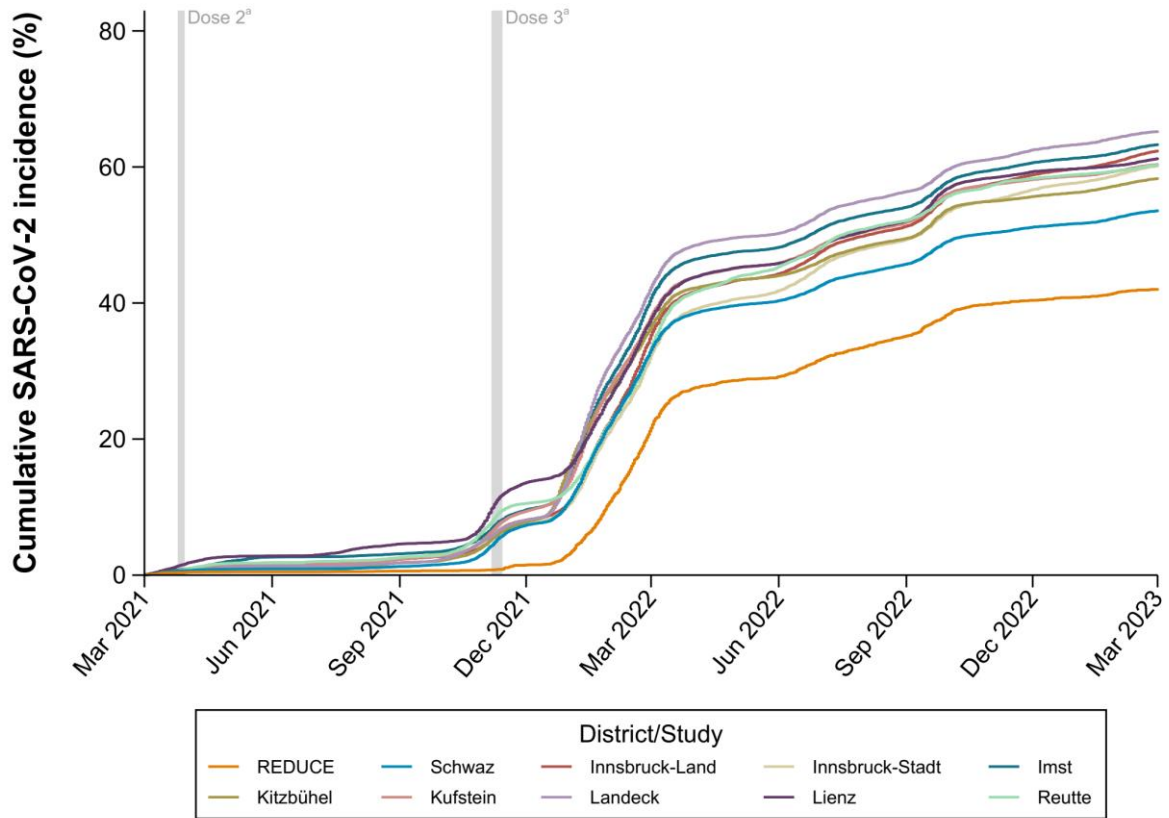

<sup>a</sup>Period in which BNT162b2 dose 2 (April 8-13, 2021) and dose 3 (November 20-28, 2021) were administered within the REDUCE study. Abbreviations: SARS-CoV-2, severe acute respiratory syndrome coronavirus type 2.

**Figure S5. SARS-CoV-2 incidence rate and cumulative incidence including recurrent infections in the REDUCE study, the district of Schwaz, and other**

districts of Tyrol, related to Figure 1.

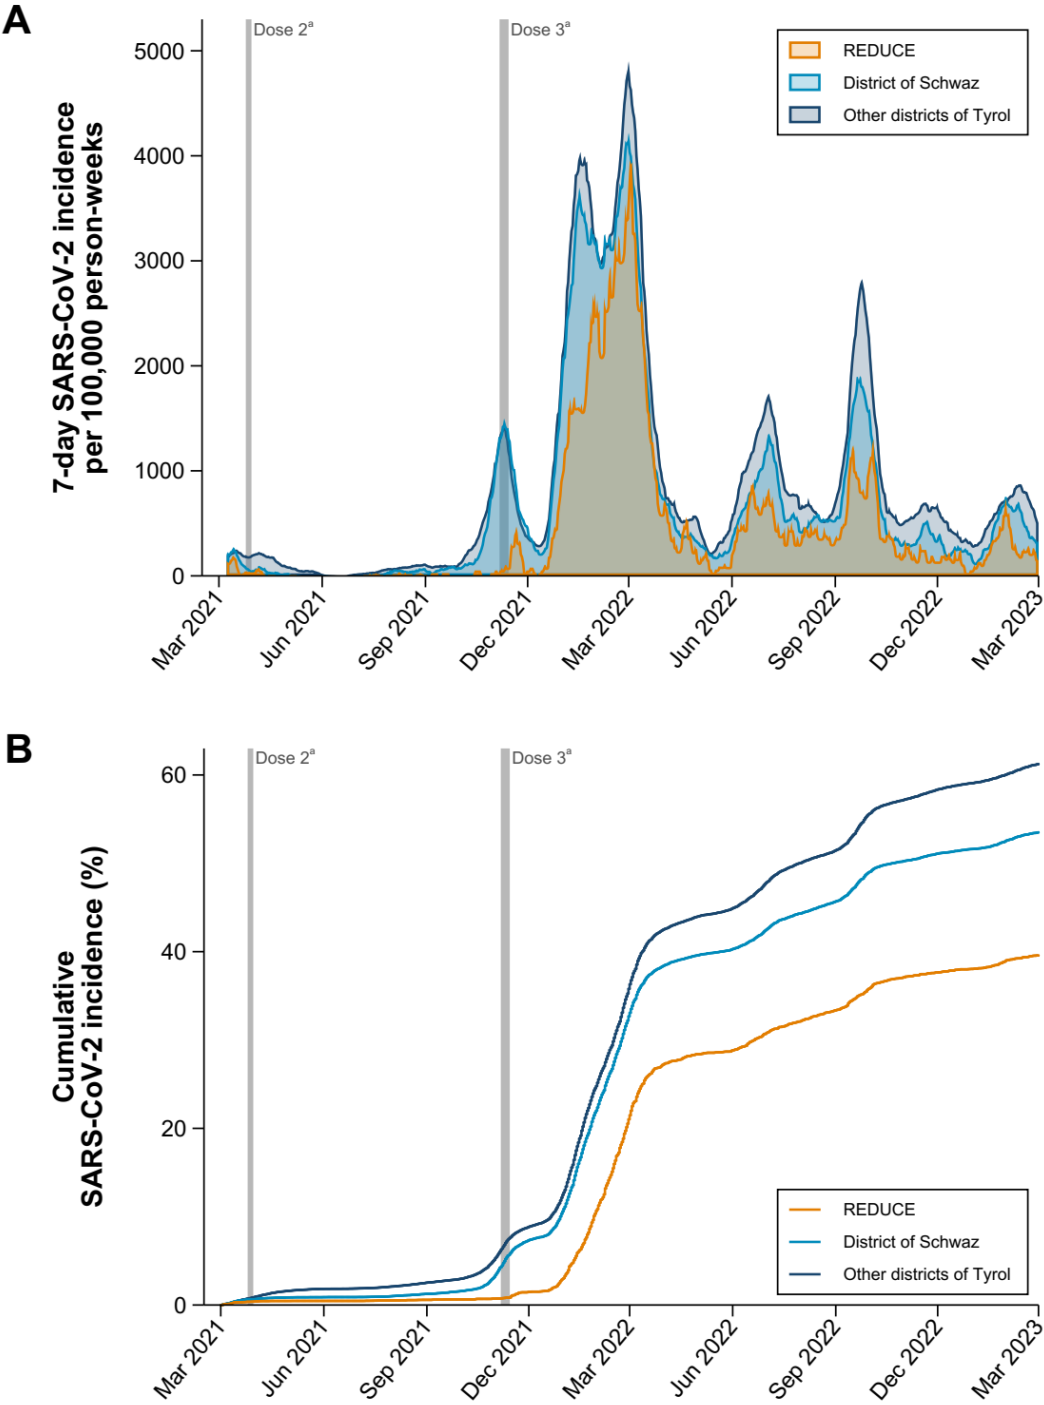

Individuals were considered to be at risk for a recurrent SARS-CoV-2 infection at 91 days after they had experienced an infection. <sup>a</sup>Period in which BNT162b2 dose 2 (April 8-13, 2021) and dose 3 (November 20-28, 2021) were administered within the REDUCE study. Abbreviations: SARS-CoV-2, severe acute respiratory syndrome coronavirus type 2.

**Figure S6. Effectiveness of the booster vaccination campaign in the REDUCE study and the district of Schwaz compared to other districts of Tyrol including**

**recurrent infections, related to Figure 2.**

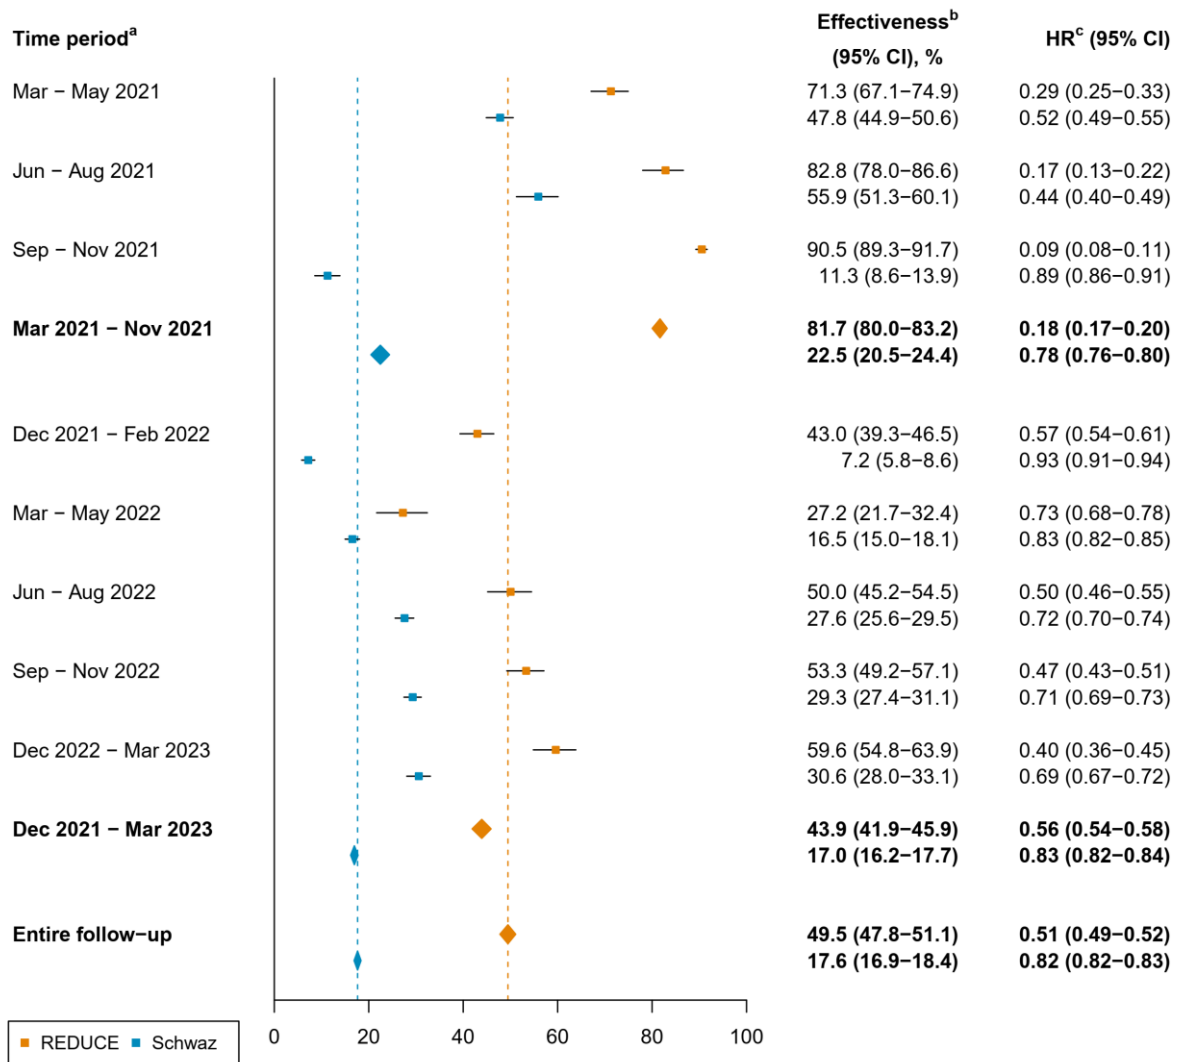

Data are represented as effectiveness, defined as one minus the corresponding hazard ratio, and 95% confidence interval. Individuals were considered to be at risk for a recurrent SARS-CoV-2 infection at 91 days after they had experienced an infection. <sup>a</sup>In general, time periods start at the first day of the month first mentioned and last until the last day of the month second mentioned, except for the first period, March – May 2021, which started on March 15, and the last period, December 2022 – March 2023, which ended on March 15. <sup>b</sup>Effectiveness of the vaccination campaign as compared to other districts of Tyrol. <sup>c</sup>Hazard ratio for incident SARS-CoV-2 infection as compared to other districts of Tyrol. Abbreviations: CI, confidence interval; HR, hazard ratio.
